# Supplementary material for: High-dimensional deconstruction of pancreatic cancer identifies tumor microenvironmental and developmental stemness features that predict survival
Source: Springer Nature journal article supplement (doi:10.1038/s41698-023-00455-z), 2023-10-19
Supplement: MOESM1 [file 41698_2023_455_MOESM1_ESM.pdf]

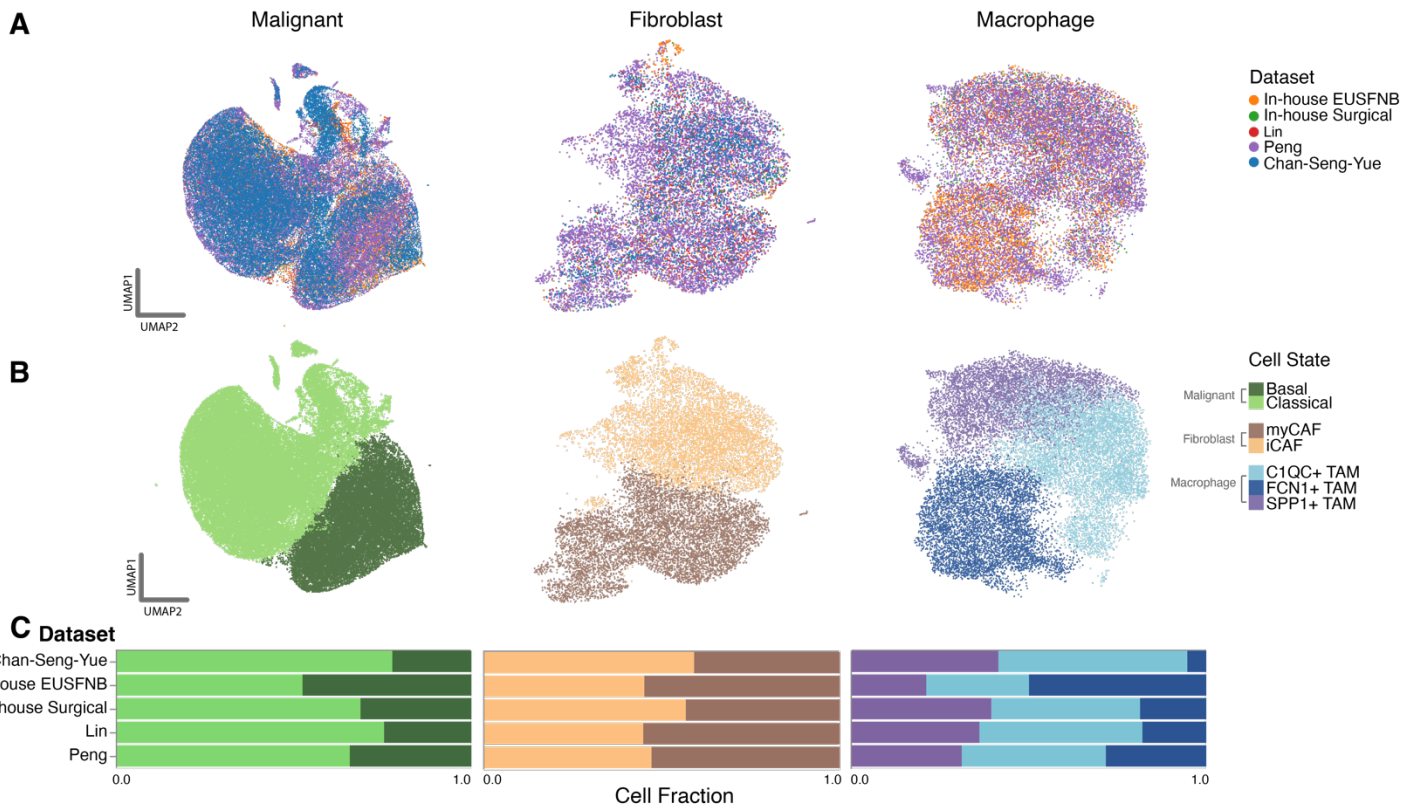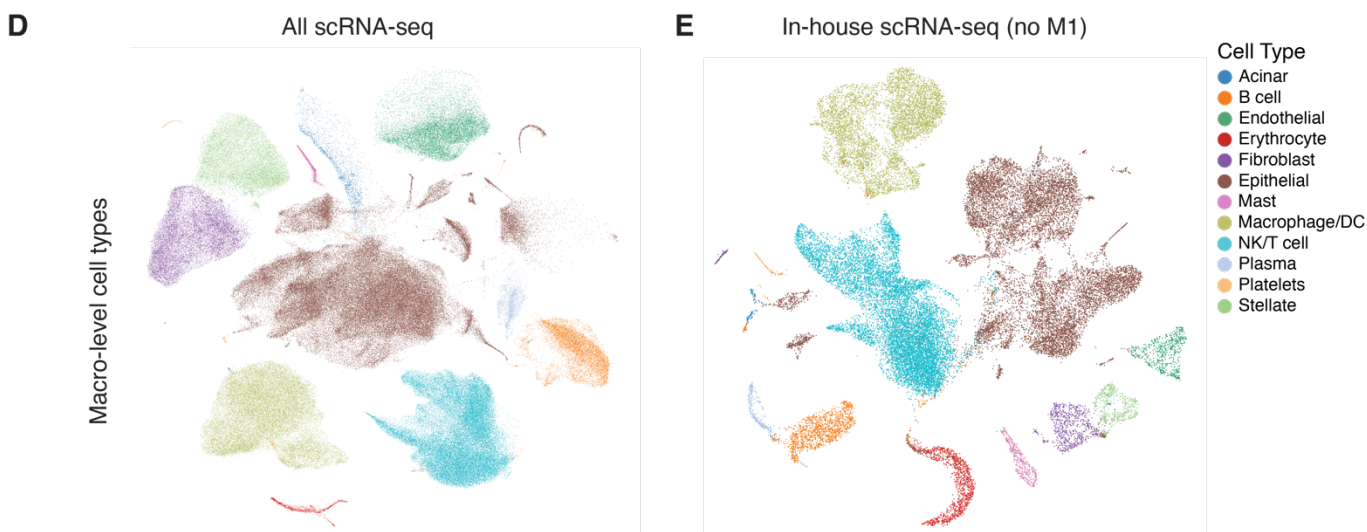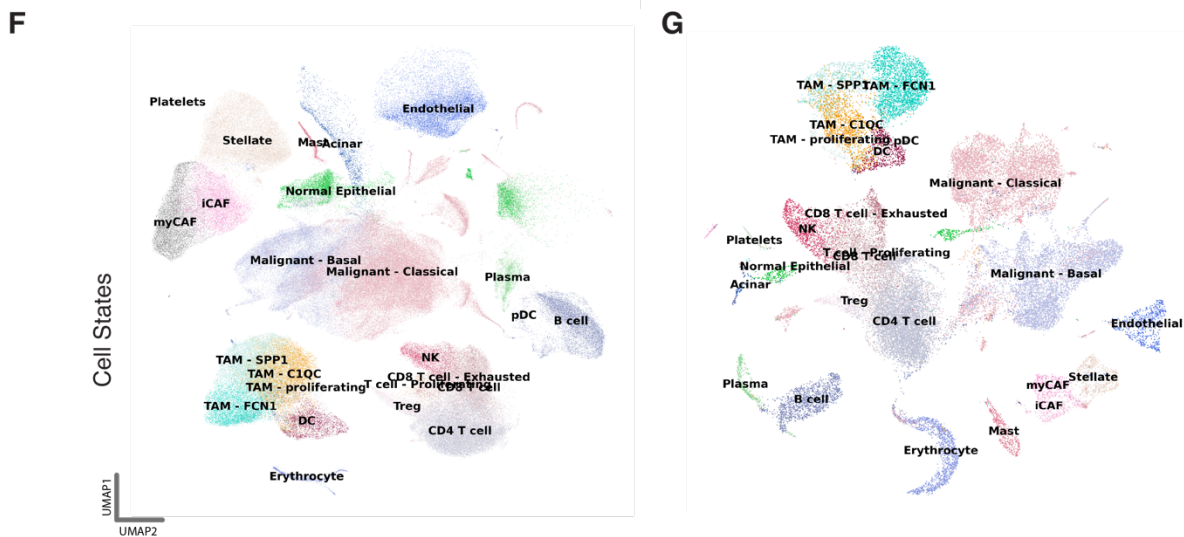

**Supplementary Figure 1. Single-cell integration.** UMAP for malignant, CAF, and TAM populations colored by **A)** dataset of origin and **B)** assigned cell state. **C)** Malignant, CAF, and TAM cell fractions by dataset. UMAP decompositions for **D,F)** all scRNA-seq samples and **E,G)** in-house scRNA-seq with no metastatic patients at diagnosis colored by macro-level cell type and granular cell state annotations. The two sets of single cell data were normalized, integrated, and clustered separately.

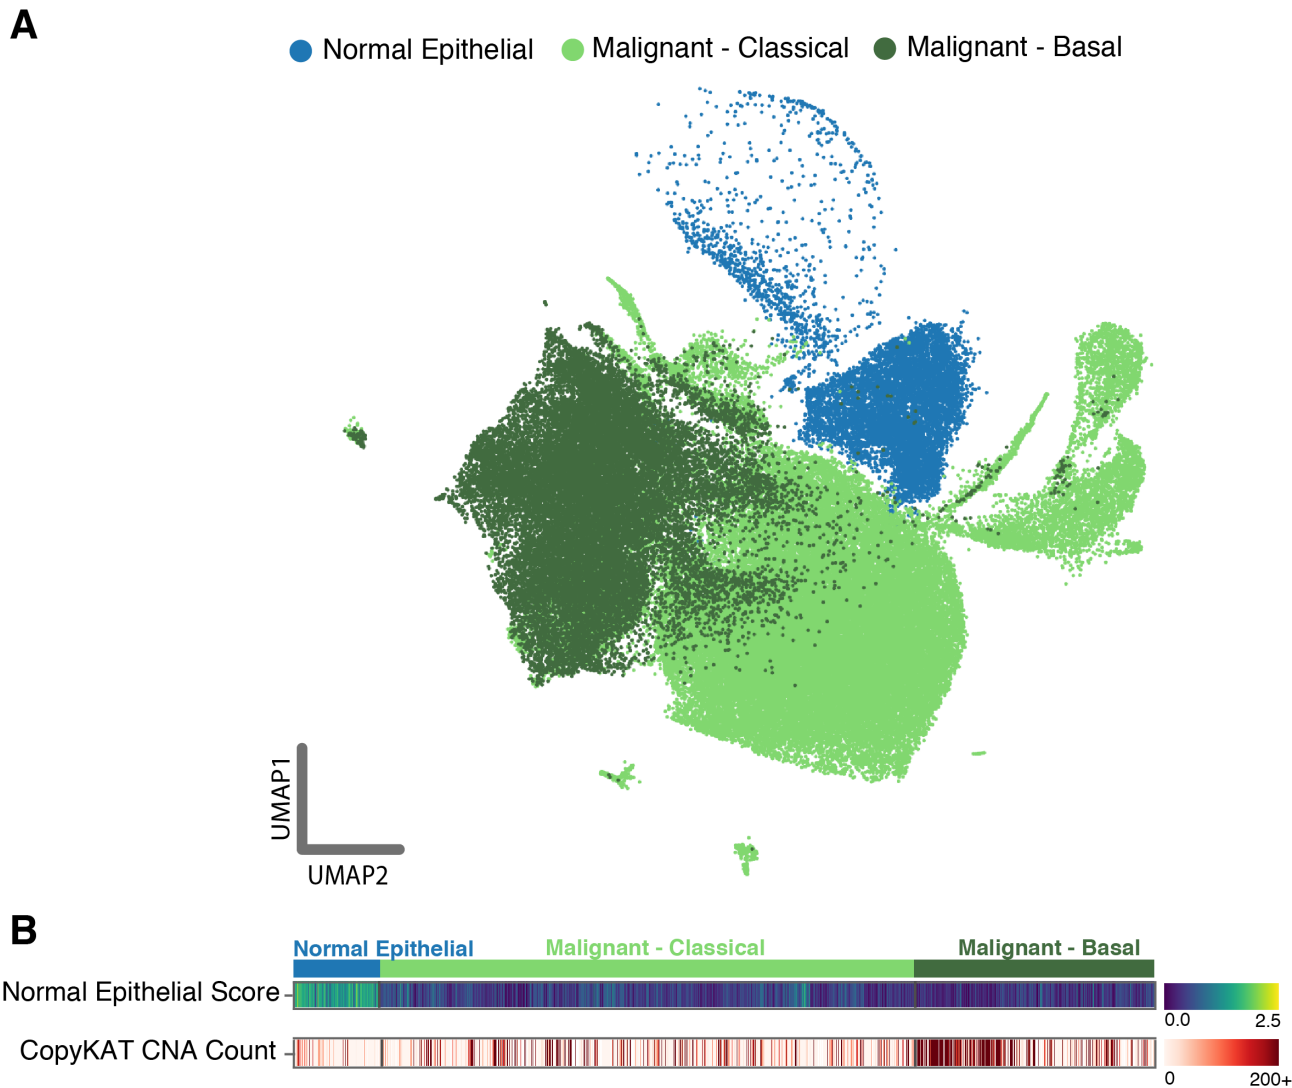

**Supplementary Figure 2. Identification of different epithelial cell states.** **A)** UMAP of all epithelial cells in scRNA-seq data, colored by epithelial cell state. **B)** Copy number alteration (CNA) count and normal epithelial gene set score for each cell analyzed by scRNA-seq, stratified by epithelial cell state.

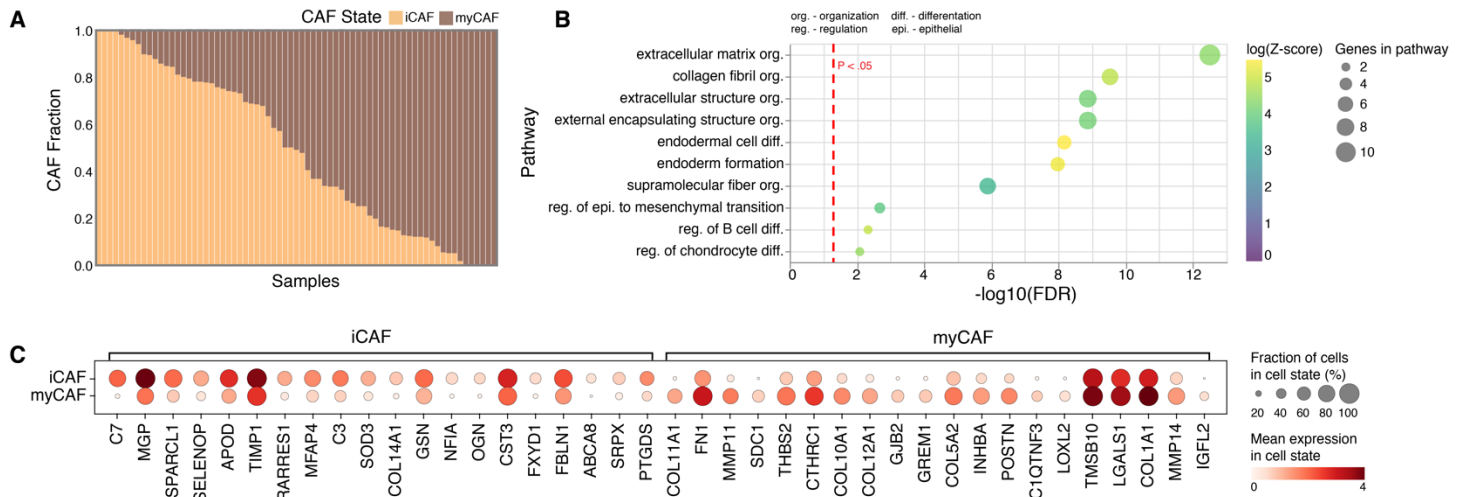

**Supplementary Figure 3. CAF enrichment and pathway analysis.** **A)** CAF cell state fraction for each scRNA-seq sample. **B)** myCAF pathway enrichment of Significant GO: Molecular Function pathways. **C)** Differentially expressed genes (DEGs) between iCAF and myCAF cell populations.

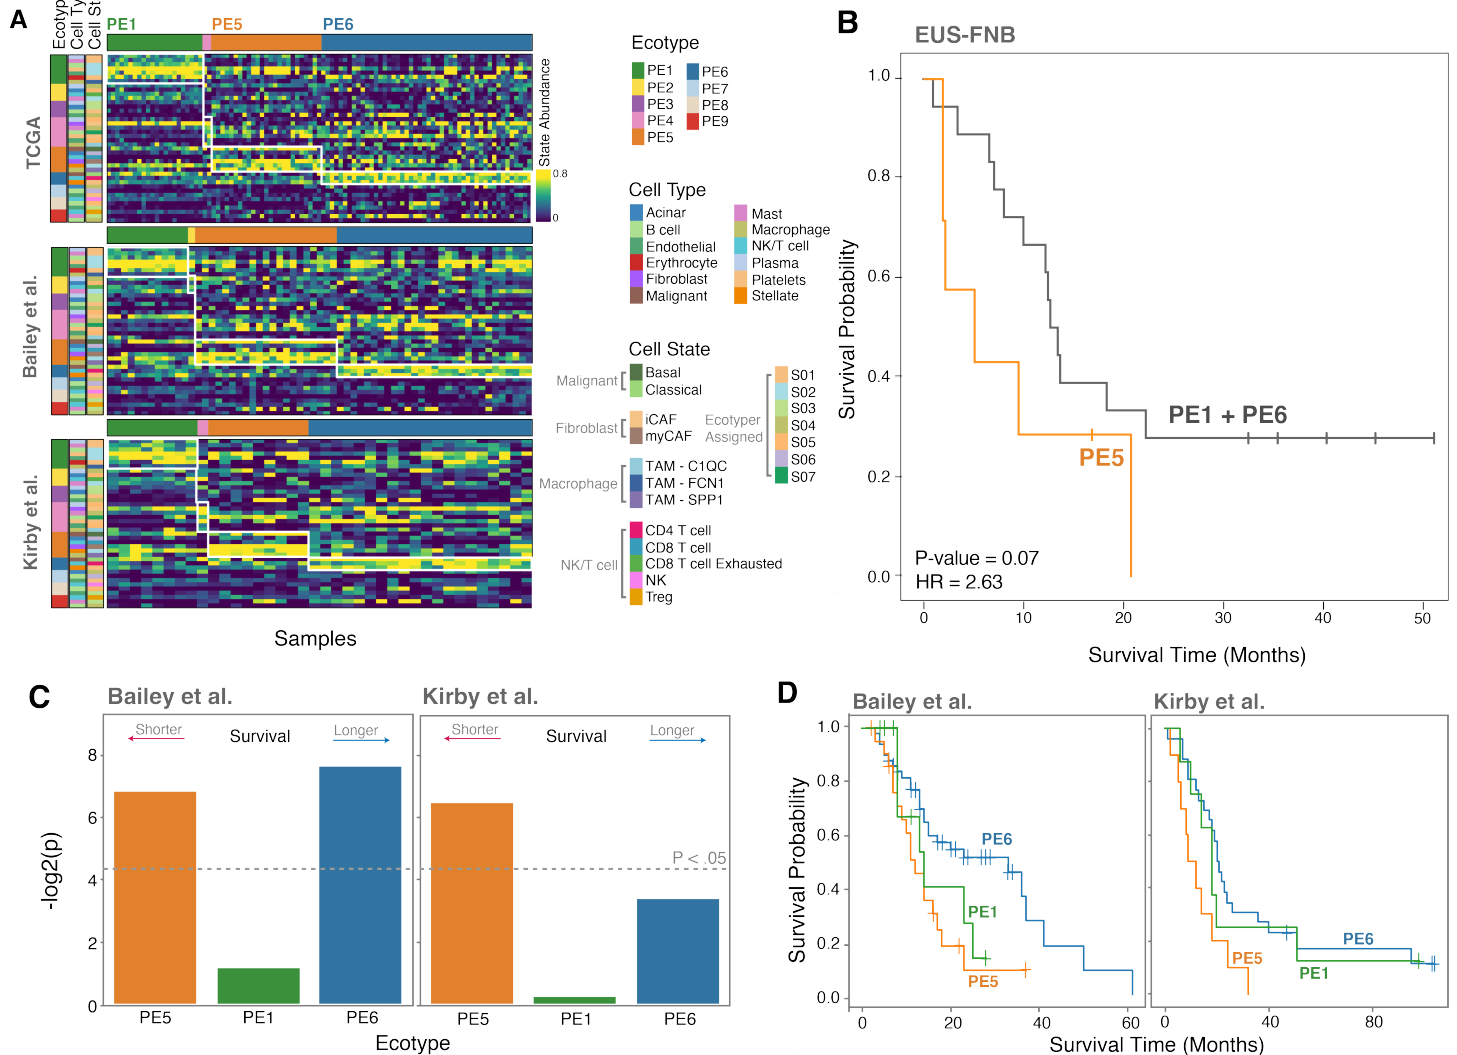

**Supplementary Figure 4. Pancreatic ecotype associations with cell state abundance and survival across independent bulk datasets.** **A)** Ecotype composition and cell state abundances for

TCGA (n = 125 tumors), Bailey et al. (n = 87 tumors), and Kirby et al. (n = 45 tumors) bulk RNA-seq datasets. **B)** Kaplan-Meier plots for EUS-FNB samples taken from the time-of-diagnosis (n = 25 patients) when pseudo-bulked and classified into ecotypes (p-value = 0.07, HR = 2.63). **C)**  $-\log_2(p\text{-value})$  associations with survival for each major pancreatic ecotype in Bailey et al. and Kirby et al. **D)** Kaplan-Meier plots for PE1, PE5, and PE6 in Bailey et al. and Kirby et al.

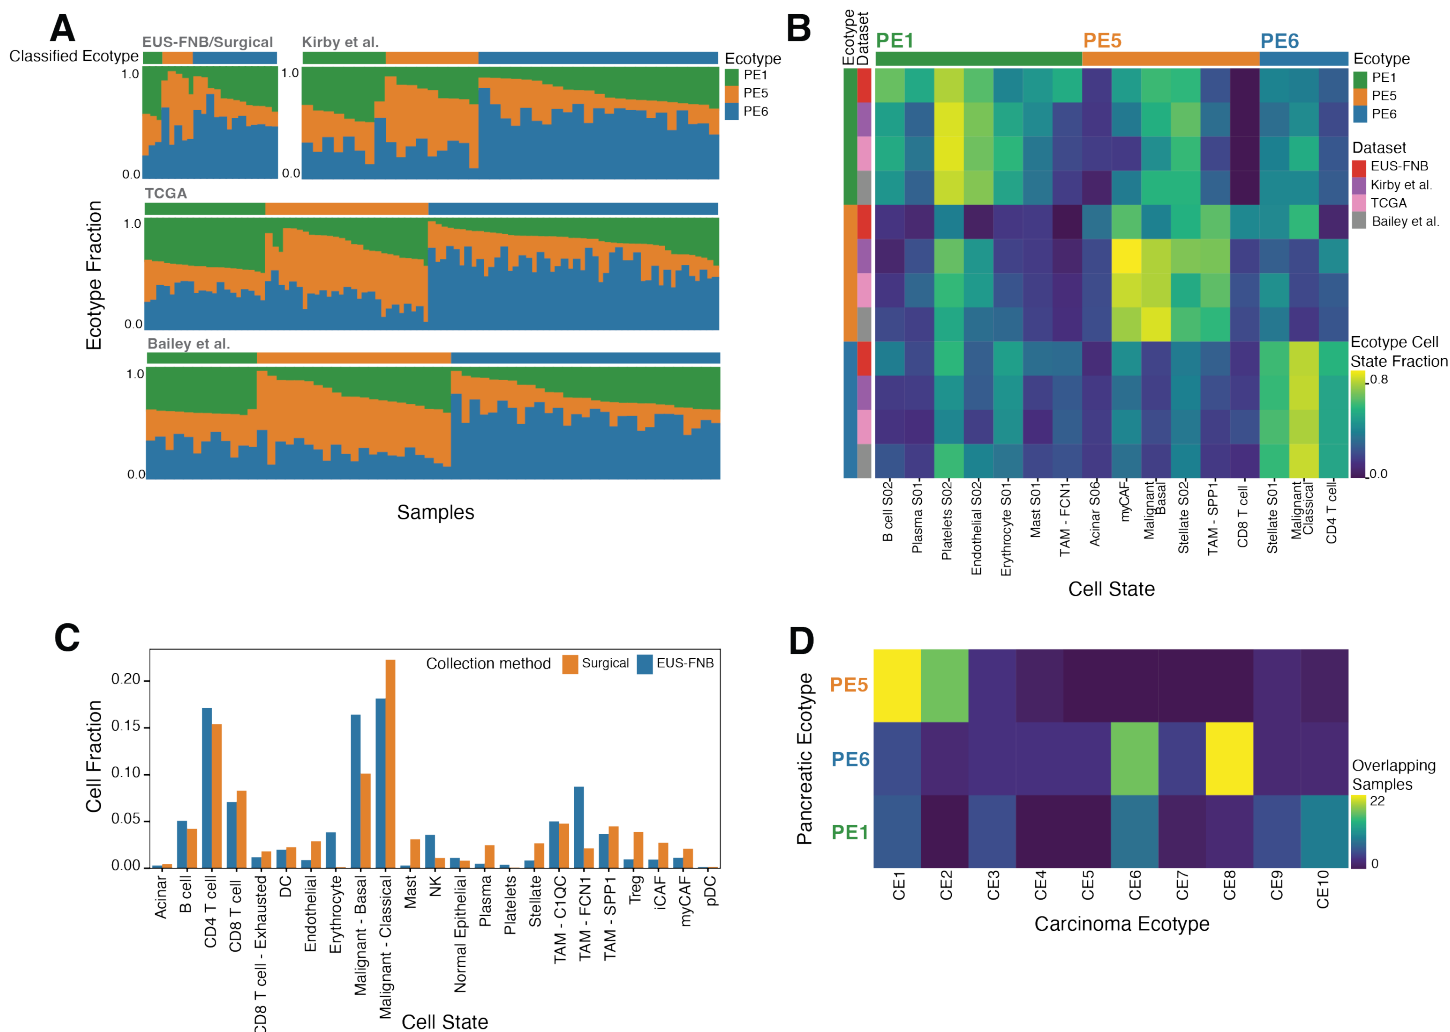

**Supplementary Figure 5. Distributions across ecotypes in single cell and bulk samples and comparison to previously published ecotypes. A)** Ecotype fractions for PE1, PE5, and PE6 ecotypes in in-house scRNA-seq and bulk RNA-seq cohorts. **B)** Ecotype-inferred cell state abundances for cell states associated with PE1, PE5, and PE6 ecotypes across in-house scRNA-seq and bulk RNA-seq datasets. **C)** Comparison of cell state fractions in EUS-FNB versus surgical resection scRNA-seq in-house cohorts. **D)** Heatmap displaying overlap of ecotype classification between pancreatic ecotypes (PE1, PE5, PE6) and carcinoma ecotypes from Luca et al.

**A**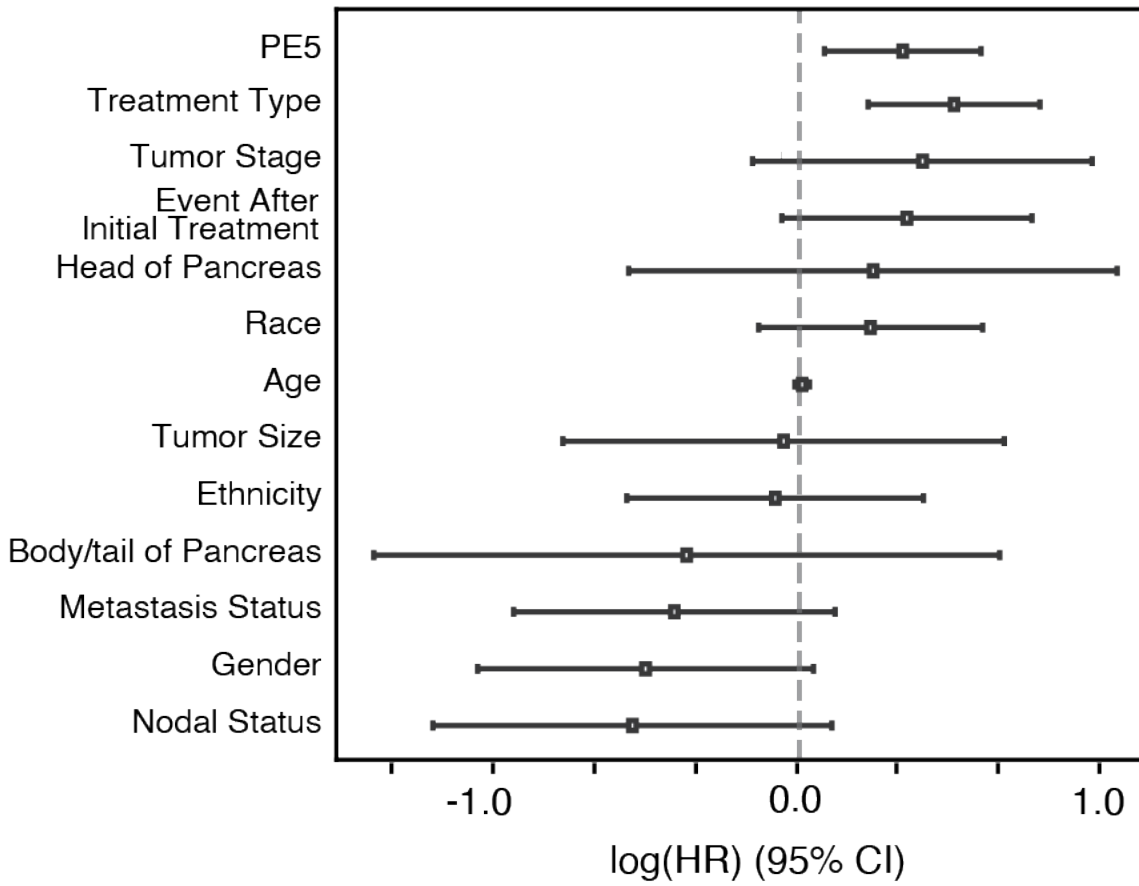

**Supplementary Figure 6. Multivariate Cox regression analysis for overall survival including pancreatic ecotype status and clinical covariates.** PE5 vs. PE1/PE6 ecotype classification in multivariate Cox proportional hazards regression analysis for overall survival along with clinical covariates in TCGA PDAC.





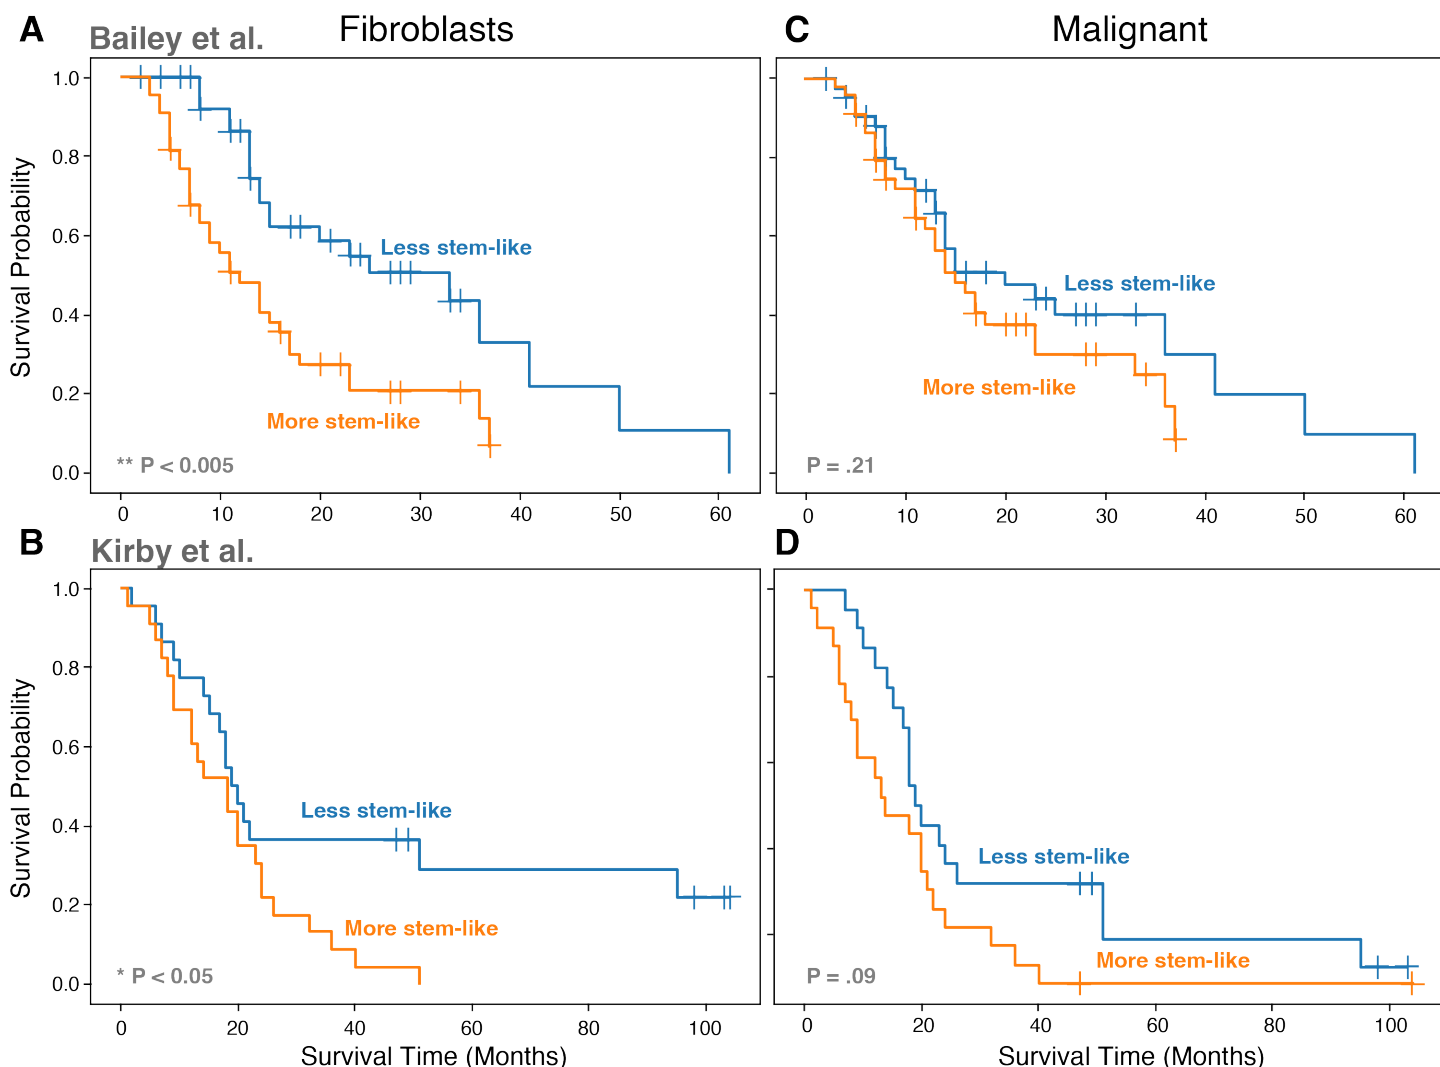

**Supplementary Figure 8. Association of developmental stemness and survival across independent bulk datasets.** **A, B)** Kaplan-Meier plots for bulk RNA-seq samples when partitioned into more versus less stem-like groups of fibroblasts in Bailey et al. (p-value = 0.0006) and Kirby et al. (p-value = 0.03). Groups were selected based on average Cytotrace correlation of cell type-specific genes. Mean score was used as a threshold to partition the two groups. **C, D)** Kaplan-Meier plots using the same methodology described above for malignant cells in Bailey et al. (p-value = 0.21) and Kirby et al. (p-value = 0.09).
